# Supplementary material for: Synergistic SA/Pebax composite membranes on ceramic supports for efficient ethanol–water separation
Source: Royal Society of Chemistry journal article supplement (doi:10.1039/d5ra09375a), 2026-03-30
Supplement: d5ra09375a1.pdf [file d5ra09375a1.pdf]

# Synergistic SA/Pebax Composite Membranes on Ceramic Supports for Efficient Ethanol-Water Separation

Fadias Rara Ardana Lakuy<sup>a</sup>, Taufik Qodar Romadiansyah<sup>a,b</sup>, Alvin Rahmad Widyantoc,  
Nur Lailiyah<sup>a</sup>, Resha Mutia Rahma<sup>a</sup>, Riska Amelia<sup>a</sup>, Mikihiro Nomura<sup>a,d</sup>, Triyanda  
Gunawan<sup>a</sup>, Zeni Rahmawati<sup>a</sup>, Nurul Widiastuti<sup>\*a</sup>

<sup>a</sup>Department of Chemistry, Faculty of Science and Data Analytics, Institut Teknologi Sepuluh  
Nopember, Kampus ITS Keputih, 60111, Sukolilo, Surabaya, Indonesia. Email:  
[nurul\\_widiastuti@chem.its.ac.id](mailto:nurul_widiastuti@chem.its.ac.id)

<sup>b</sup>Department of Chemistry, Faculty of Science and Technology, Universitas Islam Darul ‘Ulum,  
Lamongan, 62253, Indonesia

<sup>c</sup>Regional Environment Systems Course, Graduate School of Engineering and Science,  
Shibaura Institute of Technology, 3-7-5 Toyosu, Koto-ku, Tokyo 135-8548, Japan

<sup>d</sup>Materials and Chemistry Program, College of Engineering, Shibaura Institute of Technology,  
3-7-5 Toyosu, Koto-ku, Tokyo 135-8548 Japan

## Supporting Information

The processed data of contact angle characterization and membrane swelling tests are presented in Table S1 and Table S2, respectively. Meanwhile, the processed data related to membrane performance under various conditions, which have been presented in graphical form, are shown in Tables S3 to S7.

**Table S1** Membranes water contact angle

| Membranes | Water contact angle (°) |
|-----------|-------------------------|
| SA        | 48 ± 2.52               |

|                |           |
|----------------|-----------|
| SA/Pebax (5:1) | 47 ± 1.15 |
| SA/Pebax (4:1) | 39 ± 2.52 |
| SA/Pebax (3:1) | 45 ± 0.58 |
| SA/Pebax (3:2) | 49 ± 3.06 |

**Table S2** Membranes swelling test results

| Membranes      | Swelling degree (%) |
|----------------|---------------------|
| SA             | 38.5 ± 1.48         |
| SA/Pebax (5:1) | 22.8 ± 1.04         |
| SA/Pebax (4:1) | 15.8 ± 3.22         |
| SA/Pebax (3:1) | 9.6 ± 1.18          |
| SA/Pebax (3:2) | 0.9 ± 0.84          |

**Table S3** Effect of dip coating repetition on pervaporation performance

| Number of dip coating | Total flux (g m <sup>-2</sup> h <sup>-1</sup> ) | Separation factor |
|-----------------------|-------------------------------------------------|-------------------|
| 1                     | 4907 ± 0.1270                                   | 2 ± 0.18          |
| 2                     | 2759 ± 0.0041                                   | 3 ± 0.01          |
| 3                     | 345 ± 0.0008                                    | 25 ± 0.15         |

**Table S4** Effect of SA and Pebax blend ratio on pervaporation performance

| Membranes | Total flux (g m <sup>-2</sup> h <sup>-1</sup> ) | Ethanol flux (g m <sup>-2</sup> h <sup>-1</sup> ) | Water flux (g m <sup>-2</sup> h <sup>-1</sup> ) | Separation factor |
|-----------|-------------------------------------------------|---------------------------------------------------|-------------------------------------------------|-------------------|
| SA        | 1167 ± 19.98                                    | 698 ± 9.99                                        | 468 ± 8.90                                      | 6 ± 0.21          |
| SA/Pebax  | 239 ± 8.60                                      | 46 ± 4.30                                         | 193 ± 6.78                                      | 37 ± 4.14         |

|                   |            |            |            |           |
|-------------------|------------|------------|------------|-----------|
| (5:1)             |            |            |            |           |
| SA/Pebax<br>(4:1) | 345 ± 0.79 | 89 ± 0.40  | 255 ± 1.59 | 25 ± 0.15 |
| SA/Pebax<br>(3:1) | 292 ± 3.78 | 131 ± 1.89 | 161 ± 3.11 | 11 ± 0.28 |
| SA/Pebax<br>(3:2) | 80 ± 6.94  | 7 ± 3.47   | 73 ± 4.13  | 93 ± 3.97 |

**Table S5** Effect of operating temperature on pervaporation performance of SA/Pebax (4:1) membrane

| Temperature (°C) | Total flux (g m <sup>-2</sup> h <sup>-1</sup> ) | Ethanol flux (g m <sup>-2</sup> h <sup>-1</sup> ) | Water flux (g m <sup>-2</sup> h <sup>-1</sup> ) | Separation factor |
|------------------|-------------------------------------------------|---------------------------------------------------|-------------------------------------------------|-------------------|
| 30               | 40 ± 0.22                                       | 29 ± 4.28                                         | 11 ± 6.88                                       | 3 ± 0.16          |
| 40               | 66 ± 3.30                                       | 7 ± 3.73                                          | 59 ± 4.25                                       | 77 ± 7.45         |
| 50               | 133 ± 7.52                                      | 4 ± 0.56                                          | 129 ± 4.14                                      | 281 ± 1.11        |
| 60               | 172 ± 8.62                                      | 7 ± 2.08                                          | 165 ± 3.76                                      | 206 ± 4.17        |
| 70               | 292 ± 7.35                                      | 16 ± 5.17                                         | 275 ± 6.12                                      | 147 ± 7.34        |

**Table S6** Arrhenius data plots of water and ethanol

| Temperature (°C) | LnJ of Water | LnJ of Ethanol | 1000/T (K <sup>-1</sup> ) | E <sub>J,W</sub> (kJ/mol) | E <sub>J,E</sub> (kJ/mol) |
|------------------|--------------|----------------|---------------------------|---------------------------|---------------------------|
| 30               | 2.35592      | 3.37557        | 3.30033                   | 65.96                     | -11.20                    |
| 40               | 4.08669      | 1.91279        | 3.19489                   |                           |                           |
| 50               | 4.85688      | 1.38813        | 3.09598                   |                           |                           |
| 60               | 5.10829      | 1.95036        | 3.00300                   |                           |                           |

|    |         |         |         |  |  |
|----|---------|---------|---------|--|--|
| 70 | 5.61820 | 2.79678 | 2.91545 |  |  |
|----|---------|---------|---------|--|--|

**Table S7** Effect of feed concentration on the separation performance of SA/Pebax (4:1) membrane

| <b>Ethanol concentration in feed (%)</b> | <b>Total flux (g m<sup>-2</sup> h<sup>-1</sup>)</b> | <b>Separation factor</b> |
|------------------------------------------|-----------------------------------------------------|--------------------------|
| 50                                       | 2228 ± 2.56                                         | 28 ± 0.51                |
| 60                                       | 2015 ± 2.39                                         | 38 ± 0.65                |
| 70                                       | 1286 ± 4.83                                         | 56 ± 2.99                |
| 80                                       | 689 ± 0.03                                          | 123 ± 2.79               |
| 90                                       | 292 ± 7.35                                          | 147 ± 7.34               |
